# Supplementary material for: Time-Dependent Increase in Susceptibility and Severity of Secondary Bacterial Infection during SARS-CoV-2 Infection
Source: PubMed Central journal article supplement — bioRxiv. 2022 Mar 1:2022.02.28.482305. Preprint. [Version 1] doi: 10.1101/2022.02.28.482305 (PMC8902874; doi:10.1101/2022.02.28.482305), 2022-03-01
Supplement: media-1.pdf [file media-1.pdf]

## Supplemental Material

### *Time-Dependent Increase in Susceptibility and Severity of Secondary Bacterial Infection during SARS-CoV-2 Infection*

Amanda P. Smith<sup>a</sup>, Evan P. Williams<sup>b</sup>, Taylor R. Plunkett<sup>b</sup>, Muneeswaran Selvaraj<sup>c</sup>, Lindey C. Lane<sup>e</sup>, Lillian Zalduondo<sup>b</sup>, Yi Xue<sup>b</sup>, Peter Vogel<sup>f</sup>, Rudragouda Channappanavar<sup>b,c,d,†</sup>, Colleen B. Jonsson<sup>b,d,#</sup>, Amber M. Smith<sup>a,b,d,#</sup>

<sup>a</sup>Department of Pediatrics, University of Tennessee Health Science Center, Memphis, TN, USA

<sup>b</sup>Department of Microbiology, Immunology and Biochemistry, University of Tennessee Health Science Center, Memphis, TN, USA

<sup>c</sup>Department of Acute and Tertiary Care, University of Tennessee Health Science Center, Memphis, TN, USA

<sup>d</sup>Institute for the Study of Host-Pathogen Systems, University of Tennessee Health Science Center, Memphis, TN, USA

<sup>e</sup>College of Pharmacy, University of Tennessee Health Science Center, Memphis, TN, USA

<sup>f</sup>Animal Resources Center and Veterinary Pathology Core, St. Jude Children's Research Hospital, Memphis, TN, USA

# Address correspondence to [amber.smith@uthsc.edu](mailto:amber.smith@uthsc.edu) , [cjonsson@uthsc.edu](mailto:cjonsson@uthsc.edu)

†Current affiliation: Department of Veterinary Pathobiology, Oklahoma State University, Stillwater, OK, USA

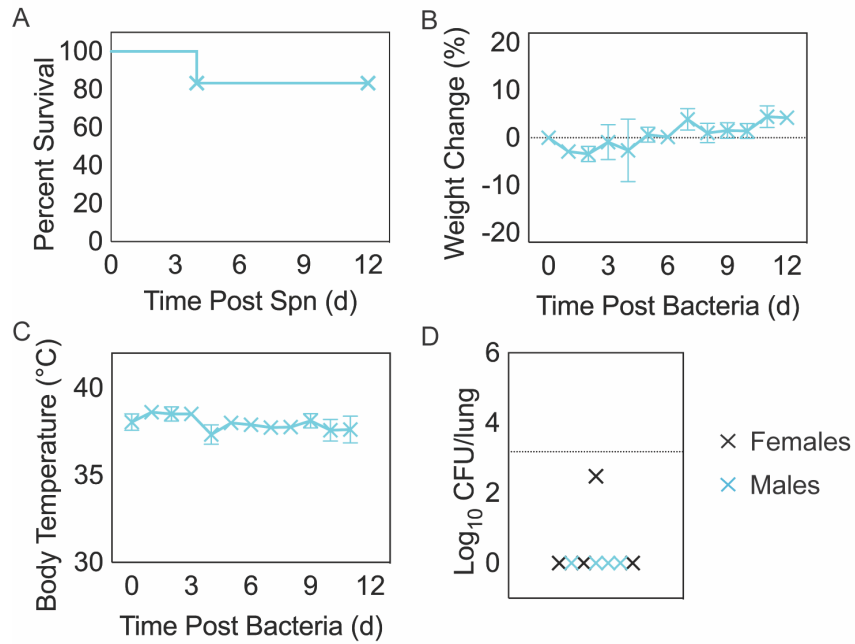

**Figure S1: *Streptococcus pneumoniae* infection in naïve K18-hACE2 mice.** Kaplan-Meier survival curve (A), percent weight loss (B), and temperature (C) of mice infected with  $10^3$  CFU D39. Data are shown as the mean  $\pm$  standard deviation (SD). Lung bacterial loads (CFU/lung) (D) in female (black) and male (cyan) mice infected with  $10^3$  CFU D39 for 24 hours.

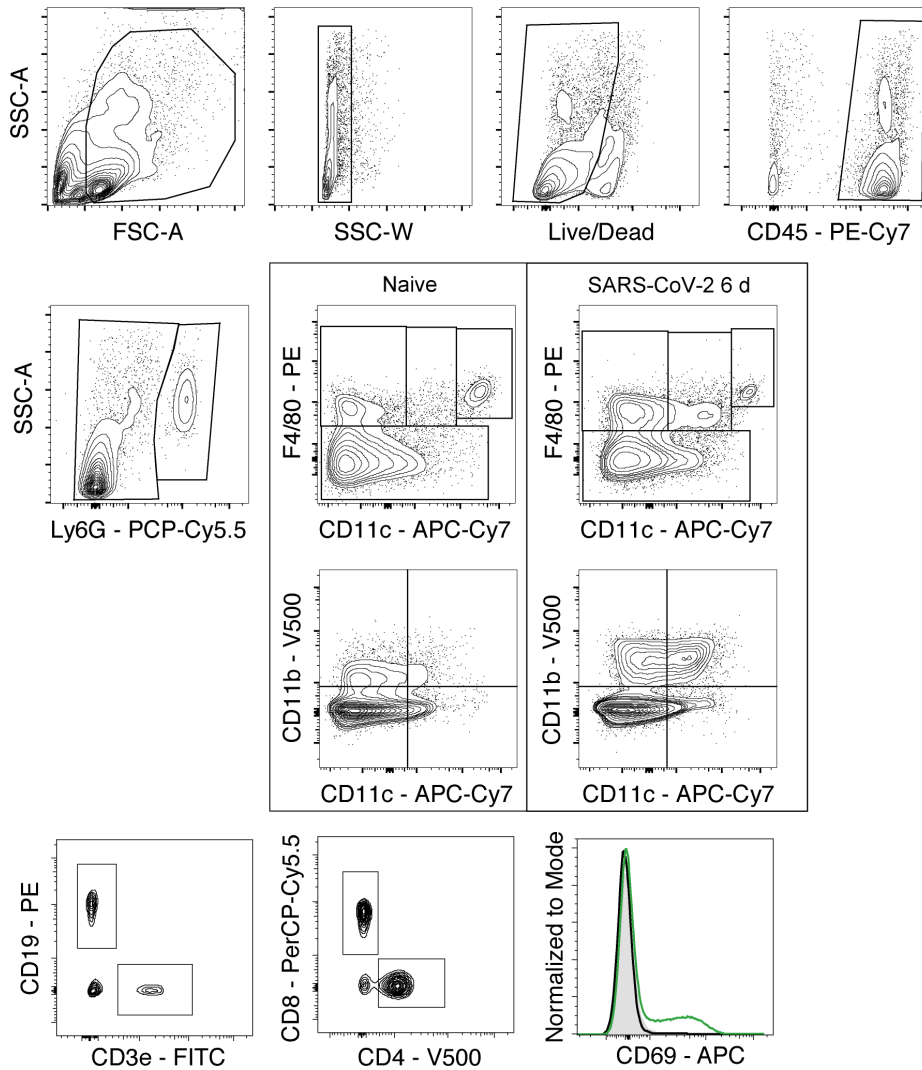

**Figure S2: Flow cytometry gating scheme for lung cell analysis.** Viable immune cells were first gated on forward scatter (FSC-A) and side scatter (SSC-A), as singlets, fixable viability dye negative, and CD45<sup>+</sup> (top row). Neutrophils (Ly6G<sup>hi</sup>) were then gated and excluded from remaining parent populations. Monocyte and macrophage (MΦ) subsets were gated based on expression of CD11c and F4/80 with alveolar macrophages (AMΦ) sub-gated as F4/80<sup>hi</sup>CD11c<sup>hi</sup>CD11b<sup>-</sup>MHC-II<sup>low/-</sup>, inflammatory macrophages (iMΦ) as F4/80<sup>hi</sup>CD11c<sup>hi</sup>CD11b<sup>+</sup>MHC-II<sup>mid/hi</sup>, and additional subsets as F4/80<sup>mid</sup>CD11c<sup>mid</sup>CD11b<sup>+</sup> and F4/80<sup>mid</sup>CD11c<sup>-</sup>CD11b<sup>+/-</sup>. Following MΦ exclusion, B cells were gated as CD3e<sup>-</sup>CD19<sup>+</sup> and T cells were gated as CD3e<sup>+</sup> and subgated into CD8<sup>+</sup> T cells (CD3e<sup>+</sup>CD8<sup>+</sup>CD4<sup>-</sup>CD335<sup>-</sup>), CD4<sup>+</sup> T cells (CD3e<sup>+</sup>CD8<sup>-</sup>CD4<sup>+</sup>CD335<sup>-</sup>), and NK T cells (CD3e<sup>+</sup>CD335<sup>+</sup>). Natural killer (NK) cells were gated CD3e<sup>-</sup>CD19<sup>-</sup>CD335<sup>+</sup>. Surface CD69 expression was used to quantify activation in all gated populations.

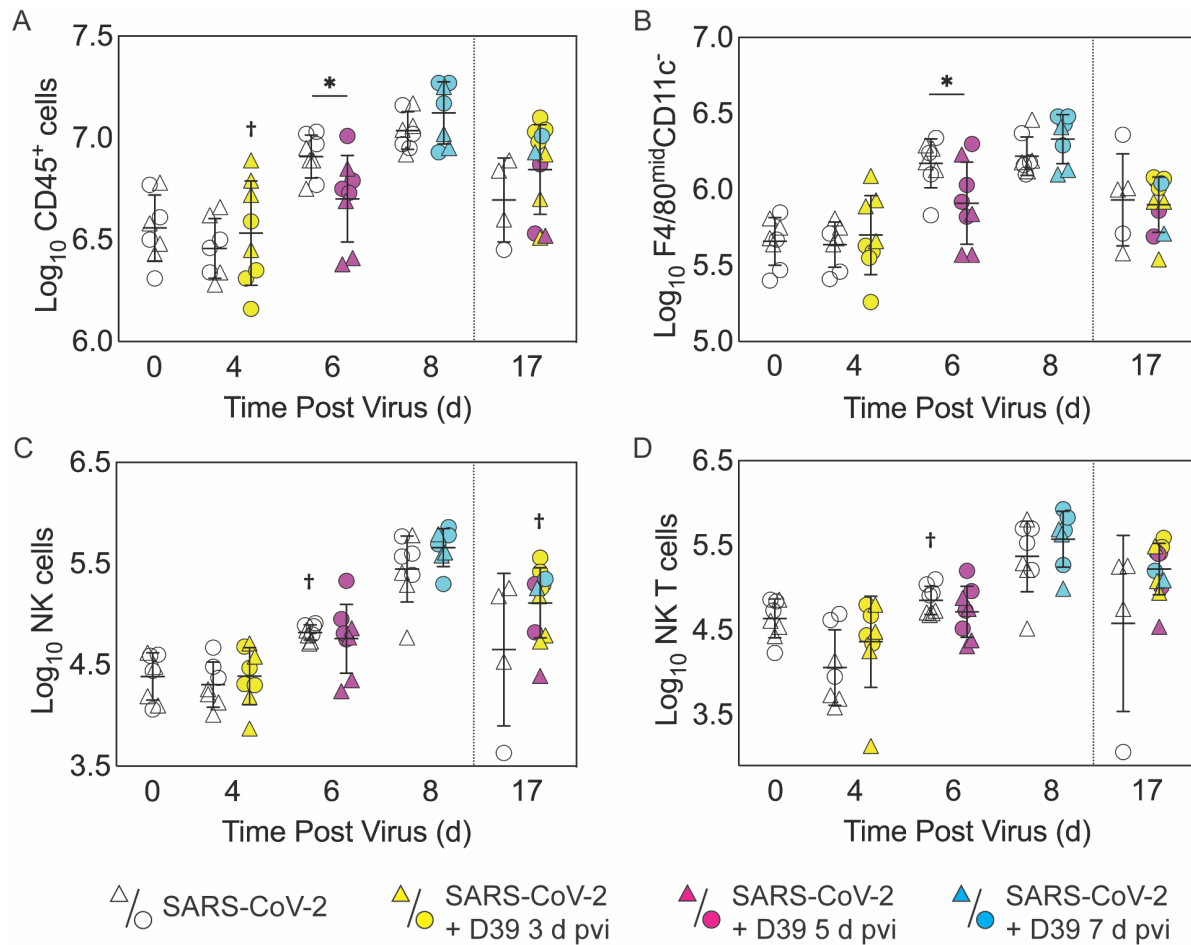

**Figure S3: Quantification of additional immune cell populations.** Total CD45<sup>+</sup> cells (A), F4/80<sup>mid</sup>CD11c<sup>-</sup>CD11b<sup>+/-</sup> cells (B), NK cells (C), and NK-T cells (D) in the lungs of female (circles) and male (triangle) mice infected with SARS-CoV-2 (250 PFU; open symbols) followed by infection with 10<sup>3</sup> CFU D39 at 3 d (yellow), 5 d (magenta), or 7 d (cyan) pvi. Each symbol represents a single mouse and the mean ± standard deviation (SD) are for combined male and female groups. Significant differences are indicated by \*, *P* < .05 for comparisons between indicated groups and as †, *P* < .05 for differences between males and females within a group or between coinfection times within 17 d group. Plots depicting additional cells are shown in Figure 3 of the main text and the flow cytometry gating scheme is in Figure S2.

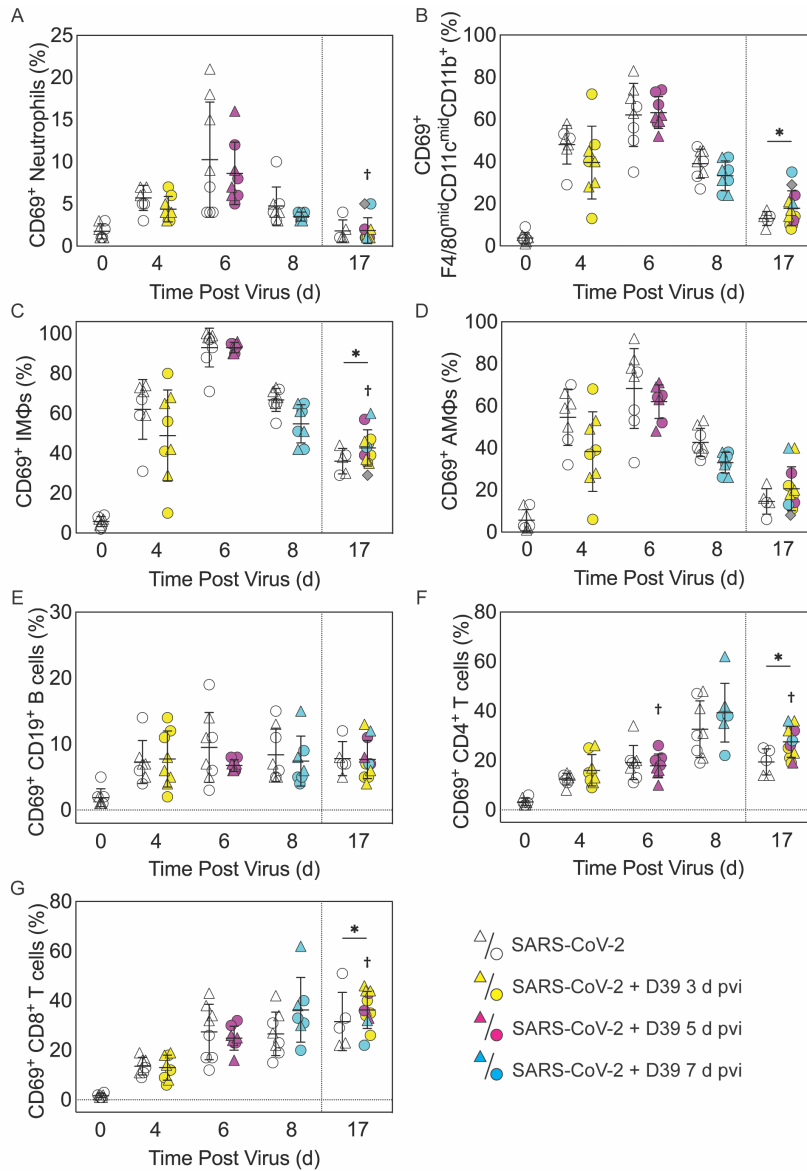

**Figure S4: Immune cell activation during SARS-CoV-2 infection and pneumococcal coinfection.** The percentage of CD69<sup>+</sup> neutrophils (A), F4/80<sup>mid</sup>CD11c<sup>mid</sup>CD11b<sup>+</sup> (B), iMΦ (F4/80<sup>hi</sup>CD11c<sup>hi</sup>CD11b<sup>+</sup>MHC-II<sup>mid/hi</sup>) (C) AMΦ (F4/80<sup>hi</sup>CD11c<sup>hi</sup>CD11b<sup>+</sup>MHC-II<sup>low/-</sup>) (D), CD19<sup>+</sup> B cells (E), CD4<sup>+</sup> T cells (F), and CD8<sup>+</sup> T cells (G) in the lungs of female (circles) and male (triangle) mice infected with SARS-CoV-2 (250 PFU; open symbols) followed by infection with 10<sup>3</sup> CFU D39 at 3 d (yellow), 5 d (magenta), or 7 d (cyan) pvi. Each symbol represents a single mouse and the mean ± standard deviation (SD) are for combined male and female groups. Significance comparisons were done using the absolute number of cells per lung and differences are indicated by \*, *P* < .05 for comparisons between indicated groups and as †, *P* < .05 for differences between males and females within a group or between coinfection times within 17 d group.

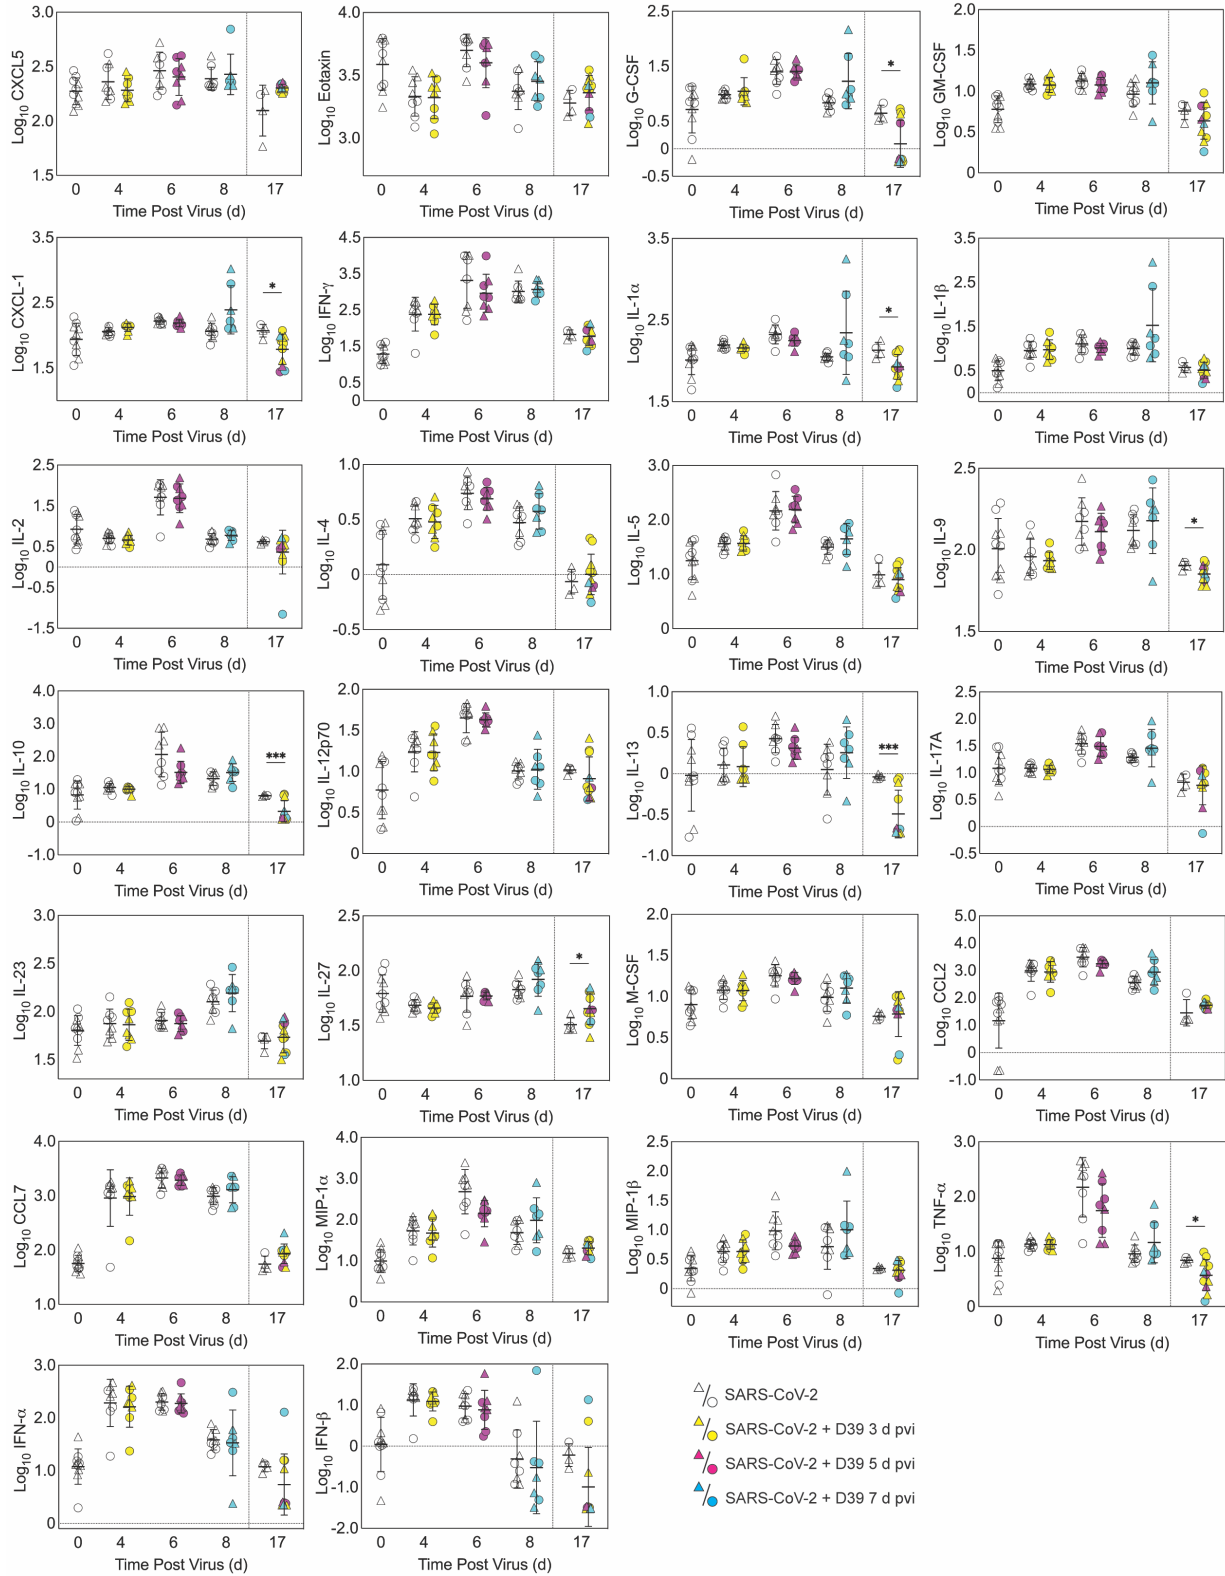

**Figure S5: Absolute quantities of pulmonary cytokines and chemokines during SARS-CoV-2 infection and pneumococcal coinfection.** The absolute picograms (log<sub>10</sub>) of cytokines and

chemokines in the lungs of female (circles) and male (triangle) mice infected with SARS-CoV-2 (250 PFU; open symbols) followed by infection with  $10^3$  CFU D39 at 3 d (yellow), 5 d (magenta), or 7 d (cyan) pvi. Each symbol represents a single mouse and the mean  $\pm$  standard deviation (SD) are for combined male and female groups. Significant differences are indicated by \*,  $P < .05$ ; \*\*,  $P < .01$ ; and \*\*\*,  $P < .001$  for comparisons between indicated groups. Plots depicting additional cytokine and chemokine quantities (absolute  $\log_{10}$  picograms) are in Figure 4 of the main text and a heatmap representing the normalized quantity (average  $\log_2$  change over naïve) is in Figure S6.

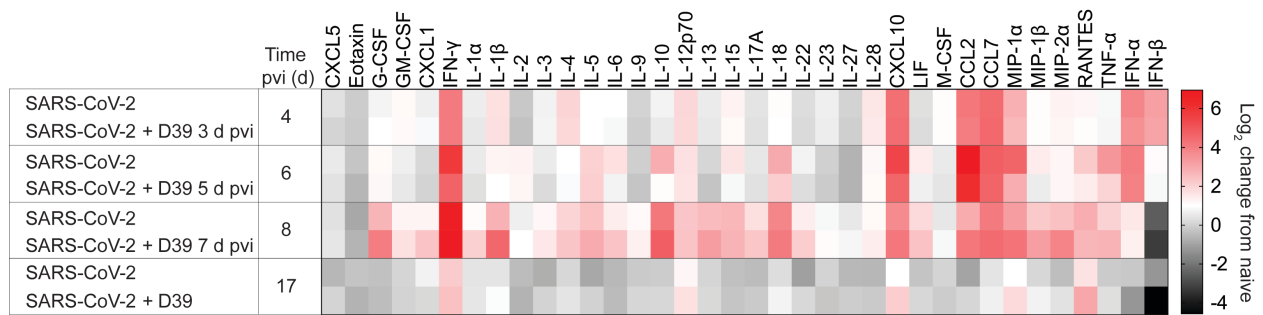

**Figure S6: Fold change over naïve of pulmonary cytokines and chemokines during SARS-CoV-2 infection and SARS-CoV-2-pneumococcal coinfection.** Heatmap representing the normalized quantity (average  $\log_2$  change over naïve) of 36 cytokines and chemokines in the lungs of mice infected with SARS-CoV-2 (250 PFU) followed by  $10^3$  CFU D39 at 3, 5, or 7 d pvi. Plots depicting absolute  $\log_{10}$  picograms (pg) of measured cytokines and chemokines are in Figure 4 and Figure S5.
